# Supplementary material
Source: PubMed Central journal article supplement (PMC2265750)
Supplement: emboj200812s1.pdf [file emboj200812s1.pdf]

## Supplementary Online Material

This figure supplements the discussion of Figure 3 of the article. For further details, see legend of Figure 3 and the related parts of the main body of the manuscript.

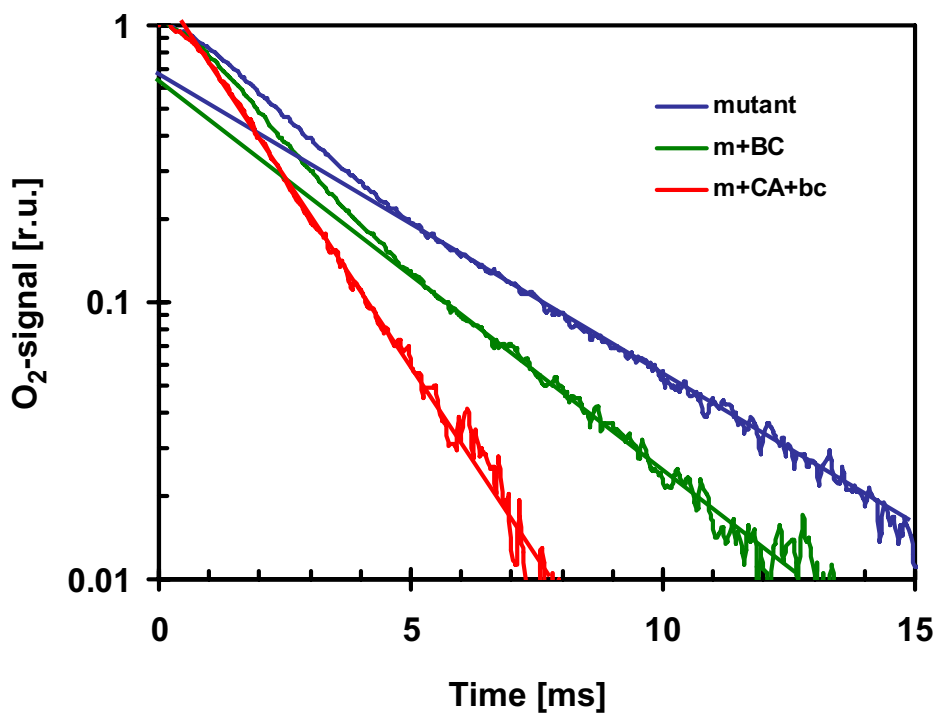

A monoexponential decay (time constant of 24 ms), which describes the O<sub>2</sub>-signal well for  $t > 15$  ms, was subtracted from the O<sub>2</sub>-release signal detected after the third flash. The semi-logarithmic plot shows that the O<sub>2</sub>-rise is bi-exponential in the PSII(Cah3-) mutant unless both bicarbonate and Cah3 are provided.

# Supplementary Online Material

This figure supplements the discussion of Figure 3 of the article. For further details, see legend of Figure 3 and the related parts of the main body of the manuscript.

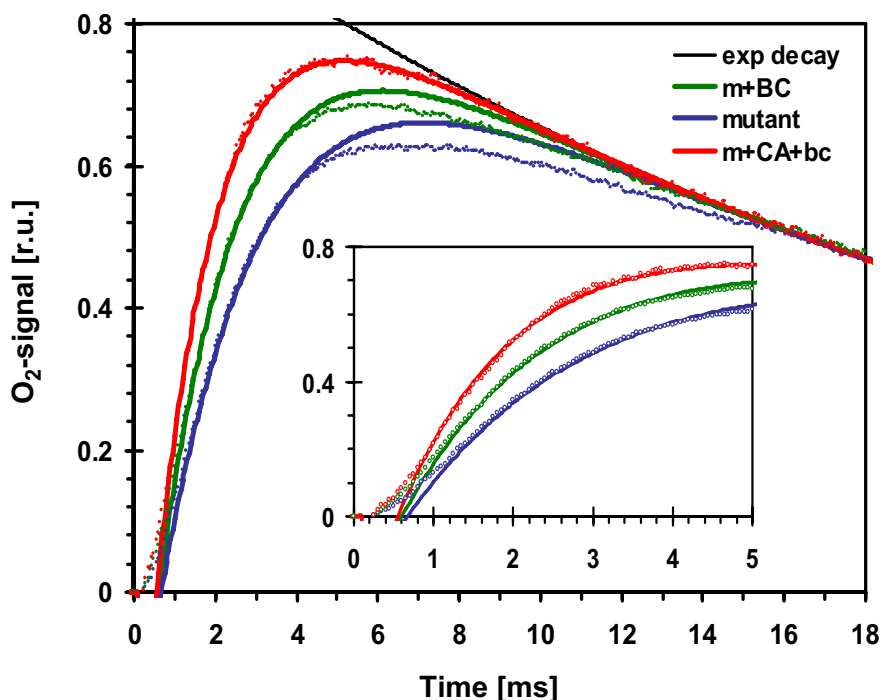

The O<sub>2</sub> rise was simulated by a single exponential term such that a good match of the initial rise ( $t < 5$  ms) and the decay phase ( $t > 15$  ms) was obtained. The need for a second rise component is clearly visible. A mono-exponential rise is sufficient only, if bicarbonate and the carbonic anhydrase are simultaneously added to the medium.

The following function was used for simulating the O<sub>2</sub> transients:

$$R_{ox}(t) = A1 \exp\{-(t-\Delta T)/T1\} + A2 \exp\{-(t-\Delta T)/T2\} + A3 \exp\{-(t-\Delta T)/T3\} \quad \text{for } t > \Delta T$$

An exact modeling of the complex origin of the initial time lag was not approached.

Instead we approximated the delayed rise by a shift of the time scale by  $\Delta T$  (for  $t > \Delta T$ ).

| <u>Simulation Parameter</u> | mutant | m+BC   | m+BC+CA |
|-----------------------------|--------|--------|---------|
| $\Delta T$ [ms]             | 0.67   | 0.60   | 0.55    |
| A1                          | -0.971 | -0.971 | -0.972  |
| T1 [ms]                     | 2.60   | 2.05   | 1.59    |
| A2                          | 0      | 0      | 0       |
| T2 [ms]                     | --     | --     | --      |
| A3                          | 0.971  | 0.971  | 0.972   |
| T3 [ms]                     | 23.95  | 23.95  | 23.9    |
| fit error                   | 57.17  | 22.40  | 3.32    |

## Supplementary Online Material

This figure supplements the discussion of Figure 3 of the article. For further details, see legend of Figure 3 and the related parts of the main body of the manuscript.

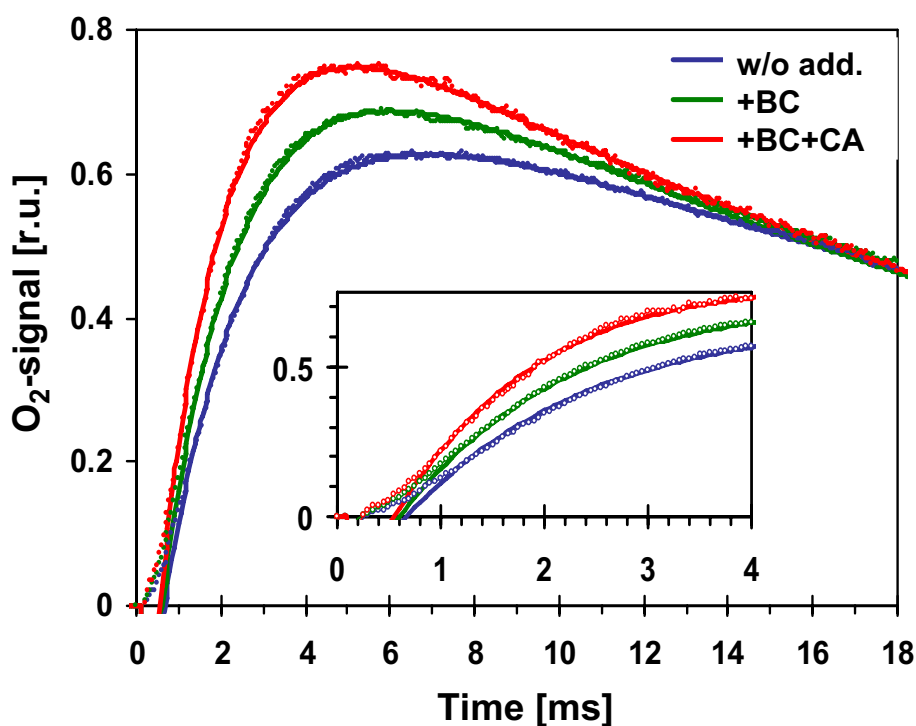

The O<sub>2</sub> rise was simulated by a biexponential. For addition of both, bicarbonate and the carbonic anhydrase, a monoexponential simulation was used.

The following function was used for simulating the O<sub>2</sub> transients:

$$R_{\text{ox}}(t) = A1 \exp\{-(t-\Delta T)/T1\} + A2 \exp\{-(t-\Delta T)/T2\} + A3 \exp\{-(t-\Delta T)/T3\} \quad \text{for } t > \Delta T$$

An exact modeling of the complex origin of the initial time lag was not approached.

Instead we approximated the delayed rise by a shift of the time scale by  $\Delta T$  (for  $t > \Delta T$ ).

| <u>Simulation Parameter</u> | mutant | m+BC  | m+BC+CA |
|-----------------------------|--------|-------|---------|
| $\Delta T$ [ms]             | 0.67   | 0.6   | 0.55    |
| A1                          | -0.65  | -0.81 | -0.97   |
| T1 [ms]                     | 1.8    | 1.8   | 1.6     |
| A2                          | -0.36  | -0.15 | --      |
| T2 [ms]                     | 6.0    | 4.0   | --      |
| A3                          | 1.00   | 0.96  | 0.97    |
| T3 [ms]                     | 23.95  | 23.95 | 23.95   |
| error                       | 1.97   | 1.79  | 3.33    |
